# Supplementary material
Source: publisher site journal article supplement (https://www.dovepress.com/article/595197)
Supplement: Supplementary file 1 [file 595197%20revised%20Supplementary%20materials.docx]

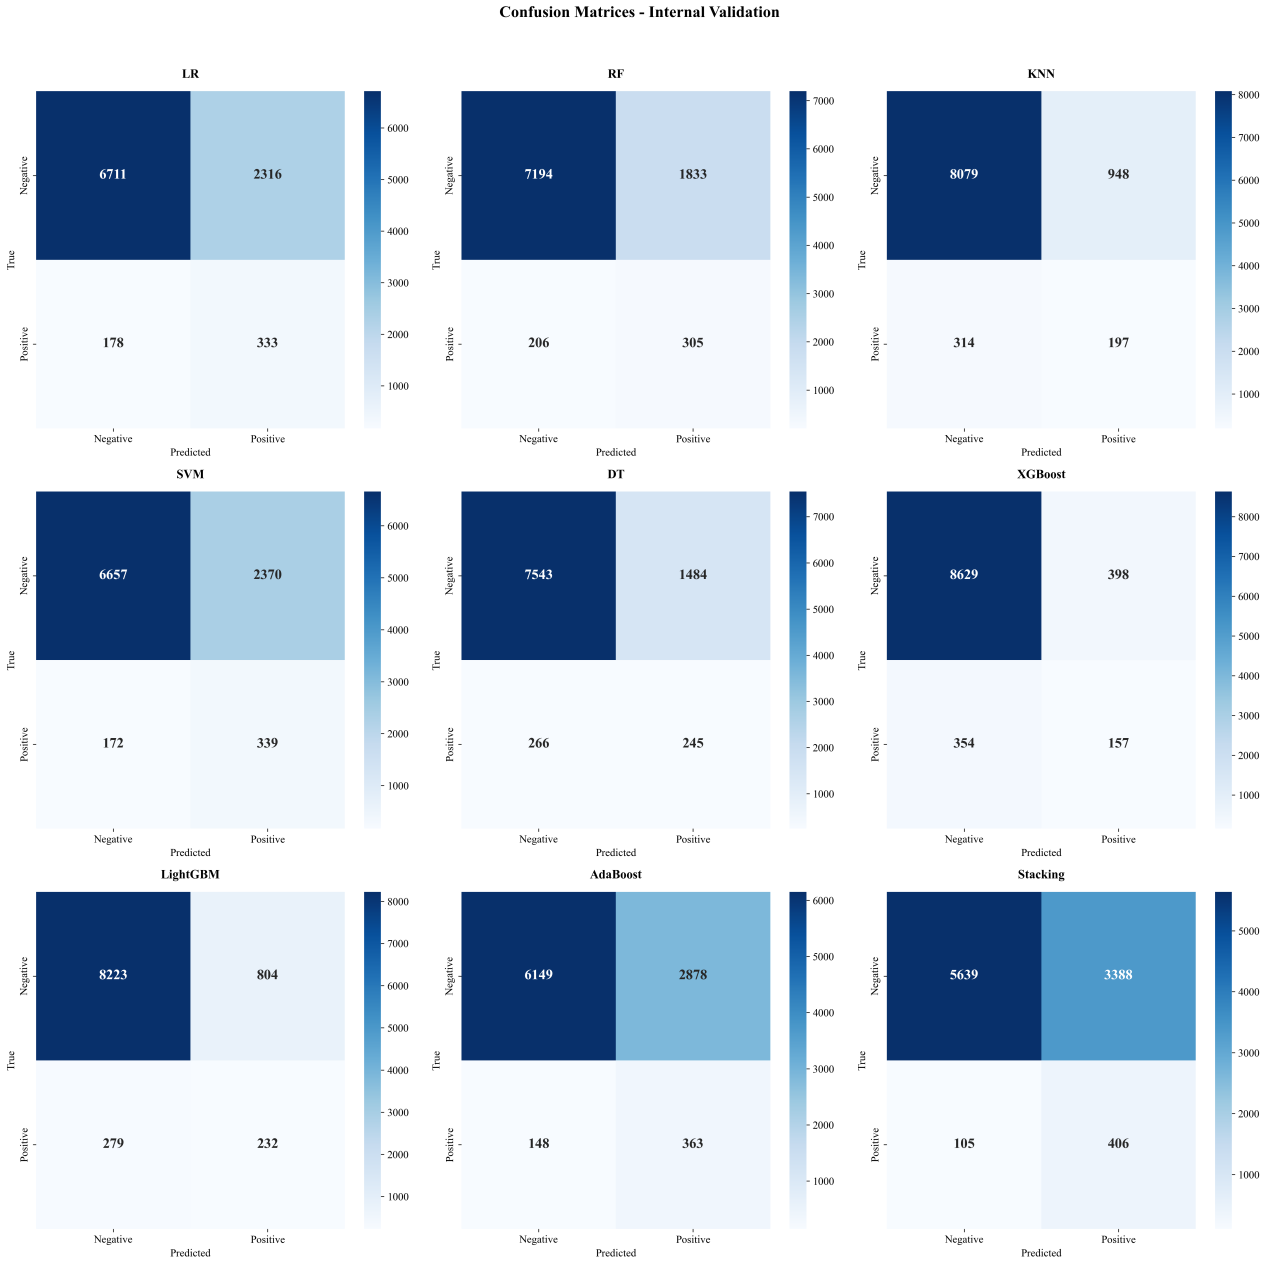


**Supplemental Figure 1. The confusion Matrix for 3-month PDAP risk stratification models with different ML algorithms in the internal validation**. PDAP, peritoneal dialysis-associated peritonitis; LR, Logistic Regression; RF, Random Forest; KNN: k-Nearest Neighbor; SVM: Support Vector machine; DT, Decision Tree; XGBoost: eXtreme Gradient Boosting; lightGBM: Light Gradient Boosting Machine, AdaBoost, Adaptive Boosting.


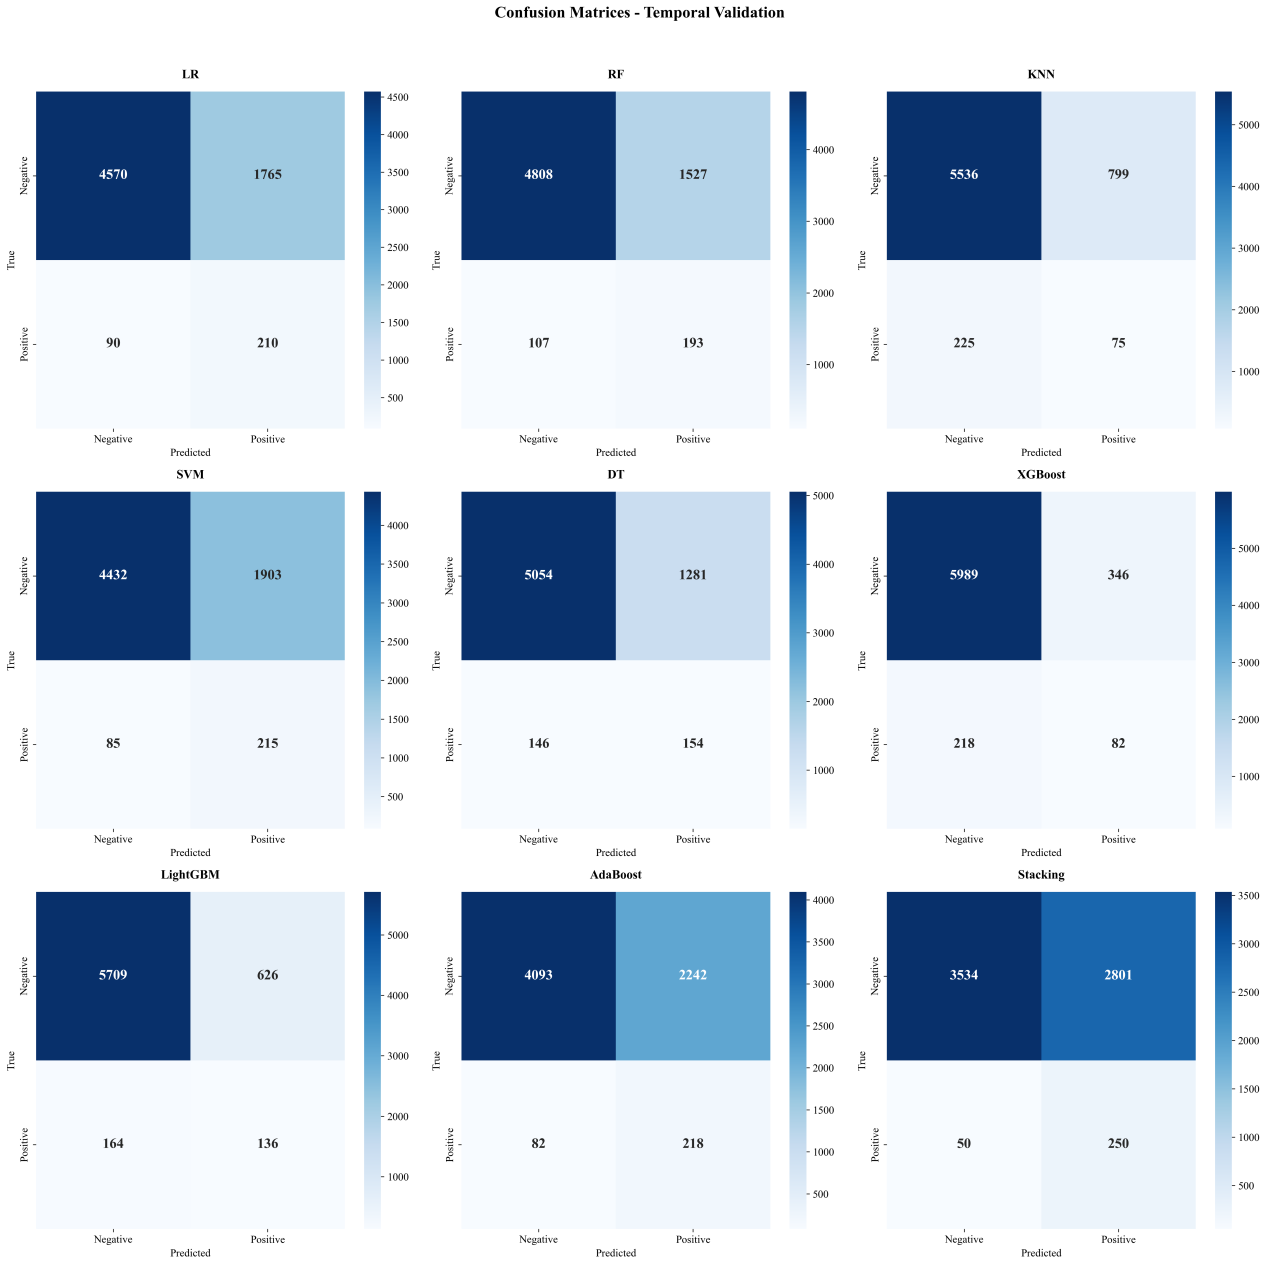


**Supplemental Figure 2.** **The confusion Matrix for 3-month PDAP risk stratification models with different ML algorithms in the temporal validation**. PDAP, peritoneal dialysis-associated peritonitis; LR, Logistic Regression; RF, Random Forest; KNN: k-Nearest Neighbor; SVM: Support Vector machine; DT, Decision Tree; XGBoost: eXtreme Gradient Boosting; lightGBM: Light Gradient Boosting Machine, AdaBoost, Adaptive Boosting.

**
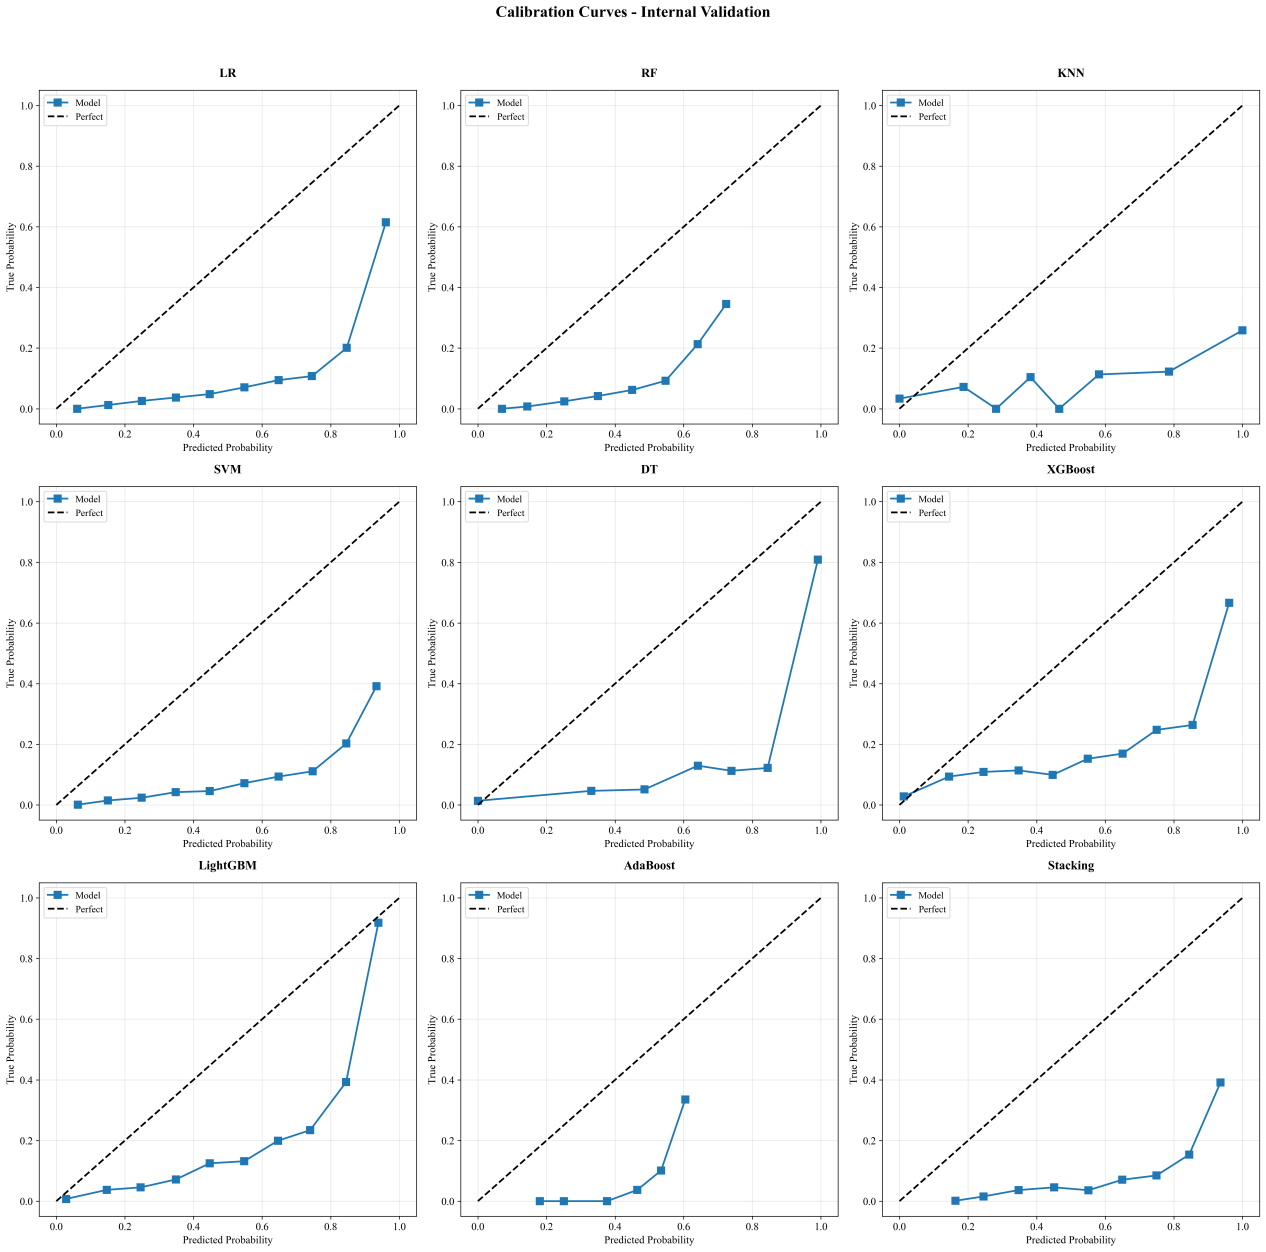
**

**Supplemental Figure 3.** **The calibration plots for 3-month PDAP risk stratification models with different ML algorithms in the internal validation**. PDAP, peritoneal dialysis-associated peritonitis; LR, Logistic Regression; RF, Random Forest; KNN: k-Nearest Neighbor; SVM: Support Vector machine; DT, Decision Tree; XGBoost: eXtreme Gradient Boosting; lightGBM: Light Gradient Boosting Machine, AdaBoost, Adaptive Boosting.


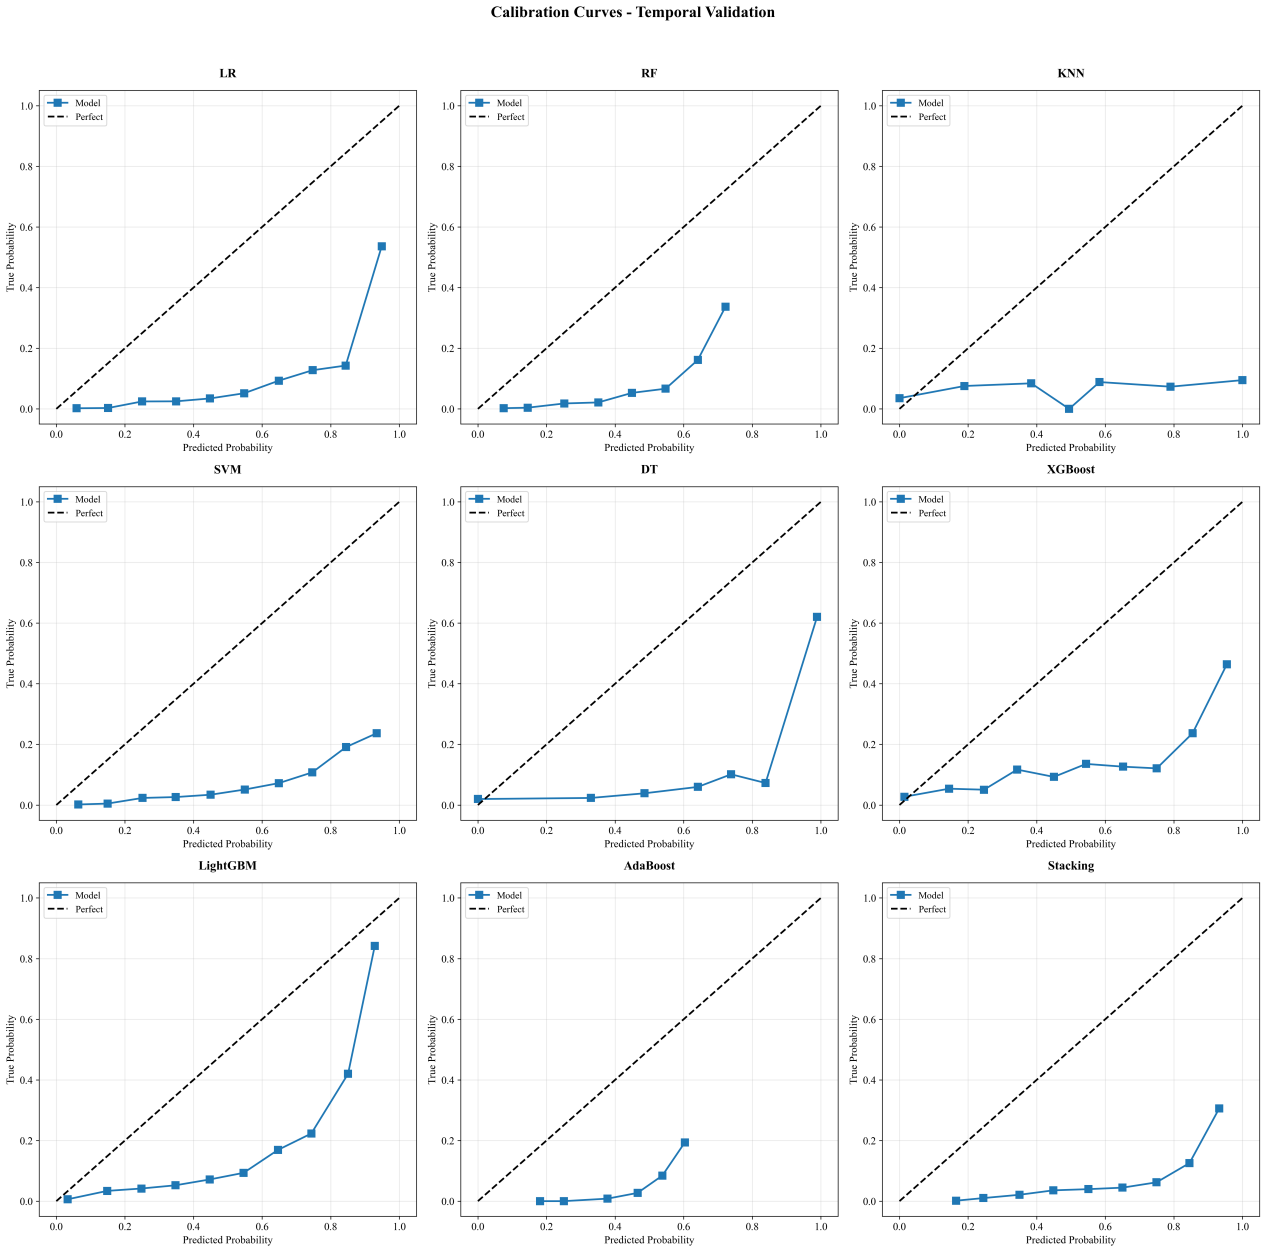


**Supplemental Figure 4.** **The calibration plots for 3-month PDAP risk stratification models with different ML algorithms in the temporal validation**. PDAP, peritoneal dialysis-associated peritonitis; LR, Logistic Regression; RF, Random Forest; KNN: k-Nearest Neighbor; SVM: Support Vector machine; DT, Decision Tree; XGBoost: eXtreme Gradient Boosting; lightGBM: Light Gradient Boosting Machine, AdaBoost, Adaptive Boosting.


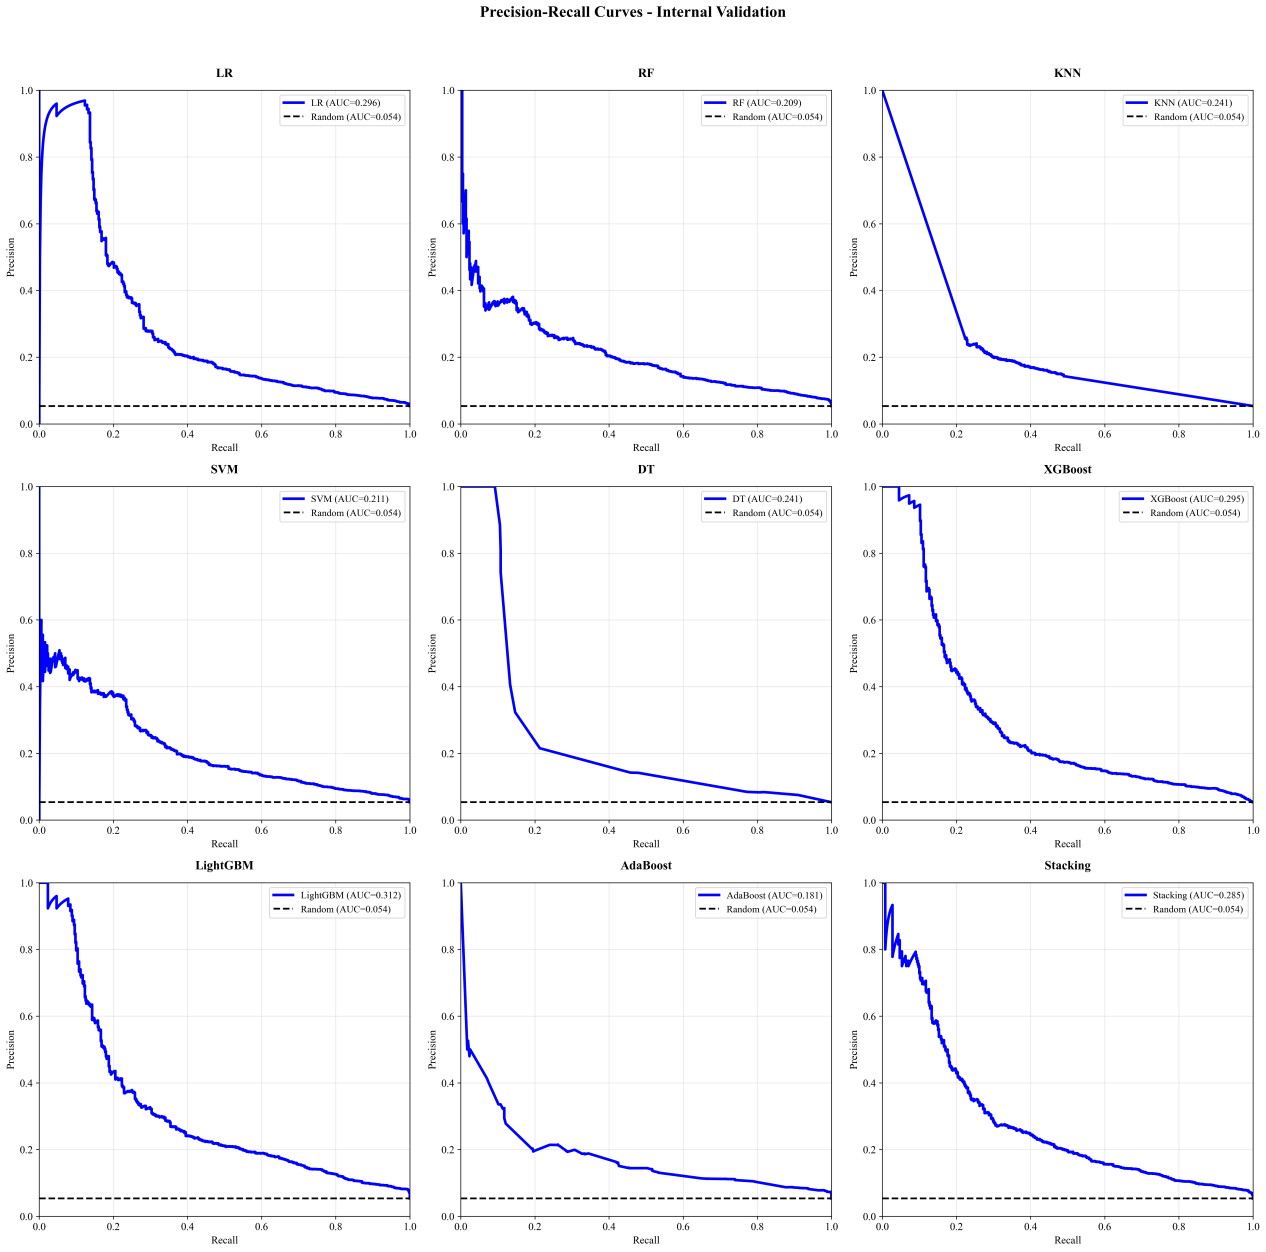


**Supplemental Figure 5.** **The precision-recall plots for 3-month PDAP risk stratification models with different ML algorithms in the internal validation**. PDAP, peritoneal dialysis-associated peritonitis; LR, Logistic Regression; RF, Random Forest; KNN: k-Nearest Neighbor; SVM: Support Vector machine; DT, Decision Tree; XGBoost: eXtreme Gradient Boosting; lightGBM: Light Gradient Boosting Machine, AdaBoost, Adaptive Boosting.


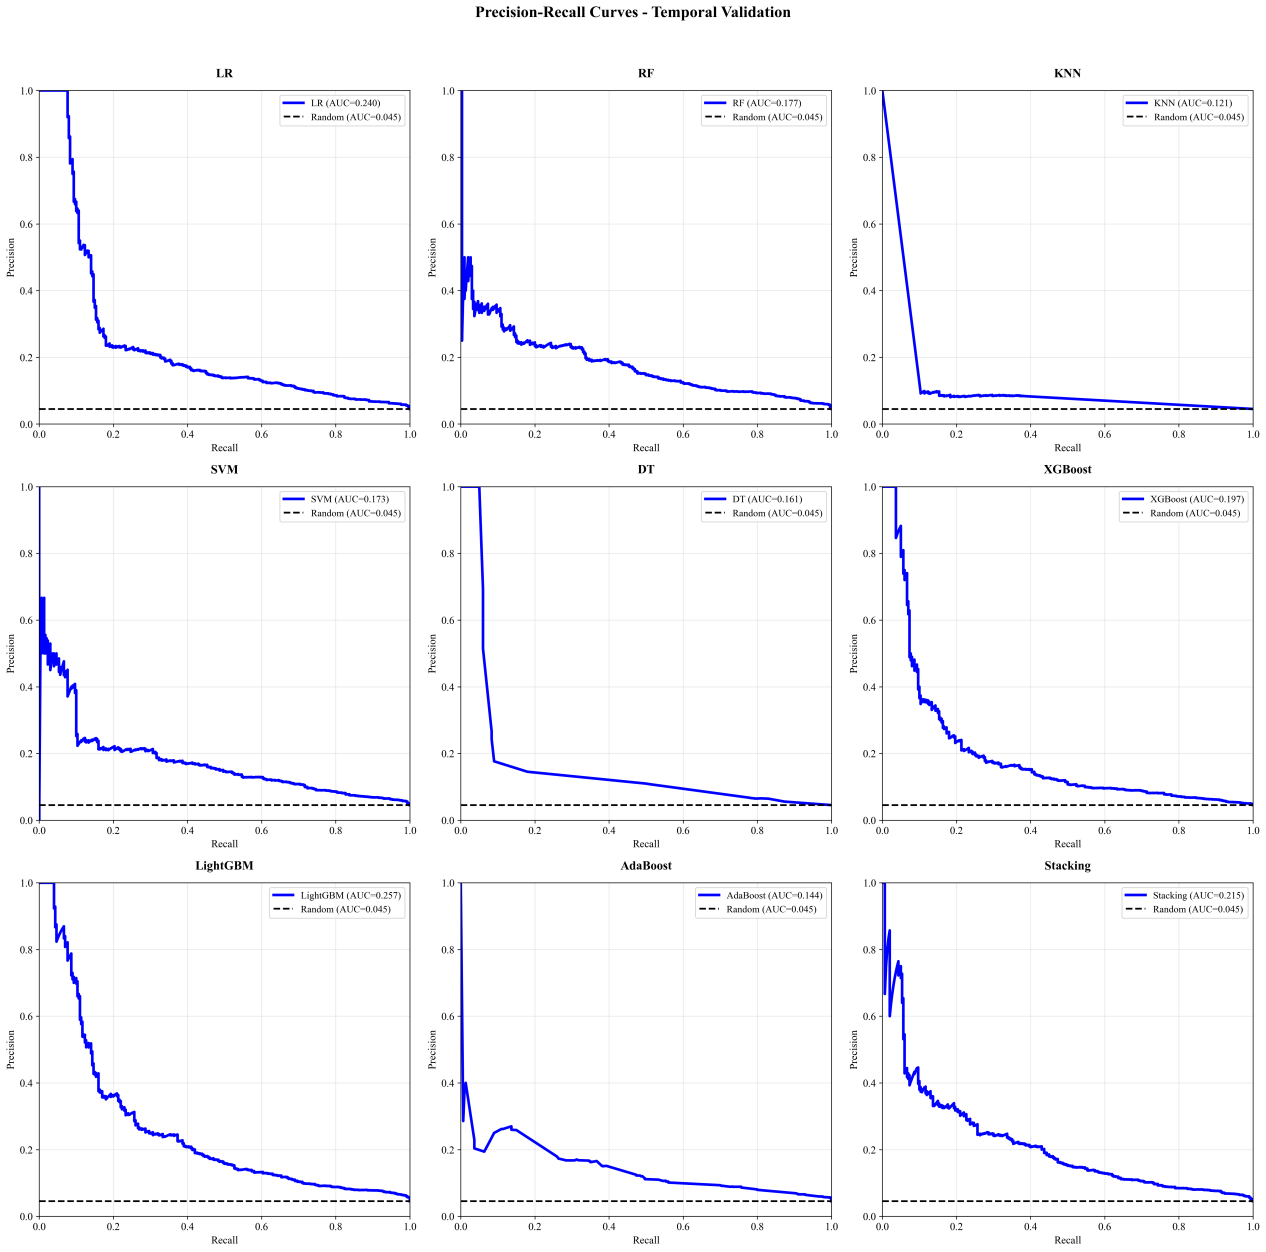


**Supplemental Figure 6.** **The precision-recall plots for 3-month PDAP risk stratification models with different ML algorithms in the temporal validation**. PDAP, peritoneal dialysis-associated peritonitis; LR, Logistic Regression; RF, Random Forest; KNN: k-Nearest Neighbor; SVM: Support Vector machine; DT, Decision Tree; XGBoost: eXtreme Gradient Boosting; lightGBM: Light Gradient Boosting Machine, AdaBoost, Adaptive Boosting.

**Supplemental Table 1 Detailed information of the enrolled all features in the original feature set**

| **Feature source** | **Feature name** | **Feature type** |
| --- | --- | --- |
| **Sociodemographic information** |  |  |
|  | Gender | Categorical feature |
|  | Age | Continuous feature |
| **Personal history** |  |  |
|  | Duration of CAPD | Continuous feature |
| **Laboratory test indexes** |  |  |
|  | WBC (Routine blood test) | Continuous feature |
|  | Neutrophils (Routine blood test) | Continuous feature |
|  | Lymphocytes (Routine blood test) | Continuous feature |
|  | PLT (Routine blood test) | Continuous feature |
|  | Hemoglobin (Routine blood test) | Continuous feature |
|  | RBC (Routine blood test) | Continuous feature |
|  | Hematocrit (Routine blood test) | Continuous feature |
|  | ALT (Biochemical test) | Continuous feature |
|  | AST (Biochemical test) | Continuous feature |
|  | TBIL (Biochemical test) | Continuous feature |
|  | Total protein (Biochemical test) | Continuous feature |
|  | Albumin (Biochemical test) | Continuous feature |
|  | Globulin (Biochemical test) | Continuous feature |
|  | TG (Biochemical test) | Continuous feature |
|  | Total cholesterol (Biochemical test) | Continuous feature |
|  | HDL-C (Biochemical test) | Continuous feature |
|  | LDL-C (Biochemical test) | Continuous feature |
|  | Blood glucose (Biochemical test) | Continuous feature |
|  | BUN (Biochemical test) | Categorical feature |
|  | Creatinine (Biochemical test) | Continuous feature |
|  | Uric acid (Biochemical test) | Continuous feature |
|  | Sodium (Biochemical test) | Continuous feature |
|  | Potassium (Biochemical test) | Continuous feature |
|  | Calcium (Biochemical test) | Continuous feature |
|  | Chlorine (Biochemical test) | Categorical feature |
|  | Phosphorus (Biochemical test) | Continuous feature |
|  | TCO2 (Biochemical test) | Continuous feature |
|  | iPTH (Biochemical test) | Categorical feature |

CAPD, continuous ambulatory peritoneal dialysis, WBC, white blood cell, PLT, platelet, RBC, red blood cells, ALT, alanine aminotransferase, AST, aspartate aminotransferase, TBIL, total bilirubin, TG, triglyceride, HDL-C, high-density lipoprotein-cholesterol, LDL-C, low-density lipoprotein-cholesterol, BUN, blood urea nitrogen, TCO2, total carbon dioxide, iPTH, intact parathyroid hormone.
